# Supplementary material for: Influence of Insulin Receptor Single Nucleotide Polymorphisms on Glycaemic Control and Formation of Anti-Insulin Antibodies in Diabetes Mellitus
Source: MDPI journal article supplement (doi:10.3390/ijms23126481), 2022-06-09
Supplement: s1 [file s1]

Table S1: Associations between selected polymorphisms in the *INSR* gene and poor glycaemic control in T1D and T2D

| SNP       | Minor allele | HbA1c ≤ 54 mmol/mol |    |    |    | HbA1c ≥ 69 mmol/mol |    |    |    | OR          | 95% CI             | p-value     |
|-----------|--------------|---------------------|----|----|----|---------------------|----|----|----|-------------|--------------------|-------------|
|           |              | n                   | pp | pq | qq | n                   | pp | pq | qq |             |                    |             |
| T1D       |              |                     |    |    |    |                     |    |    |    |             |                    |             |
| rs2245649 | C            | 40                  | 34 | 6  | 0  | 42                  | 34 | 7  | 1  | 1.51        | [0.49;4.64]        | 0.47        |
| rs2229429 | A            | 40                  | 26 | 13 | 1  | 42                  | 23 | 16 | 3  | 1.54        | [0.70;3.38]        | 0.29        |
| T2D       |              |                     |    |    |    |                     |    |    |    |             |                    |             |
| rs2245649 | C            | 43                  | 40 | 3  | 0  | 49                  | 40 | 9  | 0  | 3.17        | [0.77;12.94]       | 0.11        |
| rs2229429 | A            | 43                  | 36 | 7  | 0  | 49                  | 32 | 16 | 1  | <b>3.15</b> | <b>[1.13;8.79]</b> | <b>0.03</b> |

T1D: Type 1 diabetes mellitus, T2D: Type 2 diabetes mellitus, SNP: single nucleotide polymorphism, HbA1c: glycated hemoglobin, p: major allele, q: minor allele, OR: Odds Ratio, 95% CI: 95% confidence interval. Values marked in bold indicate 95% CI excluding 1.00, and  $p < 0.05$ . Logistic regression with adjustment for age, sex, BMI and insulin dosage.
